# Supplementary material for: Stratifying diffuse large B-cell lymphoma patients treated with chemoimmunotherapy: GCB/non-GCB by immunohistochemistry is still a robust and feasible marker
Source: PubMed Central journal article supplement (PMC4951269; doi:10.18632/oncotarget.7495), 2016-02-19
Supplement: oncotarget-07-18036-s001.pdf [file oncotarget-07-18036-s001.pdf]

# Stratifying diffuse large B-cell lymphoma patients treated with chemoimmunotherapy: GCB/non-GCB by immunohistochemistry is still a robust and feasible marker

## SUPPLEMENTARY DATA

### MATERIALS AND METHODS

#### Immunohistochemistry and TMA construction

We used a tissue arrayer device (Beecher Instruments, Sun Prairie, WI) to construct tissue microarray (TMA) blocks, according to conventional protocols. Standard tissue sections were also analyzed in some cases. Immunohistochemical staining was performed as follows: 2-4- $\mu$ m-thick paraffin-embedded TMAs were cut onto Dako slides (Dako, Agilent technologies, California, USA), and subsequently dewaxed, rehydrated and subjected to antigen retrieval by heating in 50 mM Tris (Trizma base)-1 mM EDTA (ethylenediaminetetraacetic acid) (Sigma Chemicals, St. Louis, USA,) (pH 8) or citrate 10 mM pH 6.5 in a pressure cooker for 2 min. The slides were cooled and treated with peroxidase-blocking solution (Dako) for 5 min. Sections were then immunostained with antibodies against Gcet1, MUM1, CD10, BCL6, FOXP1, C-MYC, BCL2 and pSTAT3, counterstained with hematoxylin and mounted. Incubations, either omitting the specific antibody or containing unrelated antibodies, were used as a negative control of the technique.

The antibodies used were CD10 (clone 56C6, RTU, DAKO), bcl6 (clone PG-B6p, RTU, DAKO), MUM-1/IRF4 (clone MUM1P, RTU, DAKO), Gcet1 (clone RAM, dilution 1:4, CNIO, Madrid, Spain) and FOXP1 (clone JC12, dilution 1:100, CNIO), C-MYC (EP121 Epitomics),

BCL2 (clone 124 DAKO), pSTAT3 (clone EP2147Y, Chemicon).

#### INTERPHASE FISH ANALYSIS

FISH analyses were performed on 3- $\mu$ m TMA tissue sections applying 10  $\mu$ l of commercial probes against *MYC* (LSI MYC Dual Color, Break Apart, 01N63-020, Abbott Molecular, Abbott Park, IL, USA), *BCL2* (LSI BCL2 (18q21) Dual Color, Break Apart, 05N51-020, Abbott Molecular), *BCL6* (LSI BCL6 Dual Color, Break Apart, 01N23-020, Abbott Molecular) or *IRF4* (RF<sup>TM</sup> POSEIDON<sup>TM</sup> IRF4 / DUSP22 (6p25) Break Apart Probe, KBI-10613, KREATECH Diagnostics, Amsterdam, The Netherlands).

#### REFERENCES

1. García JF, Maestre L, Lucas E, et al: Genetic immunization: a new monoclonal antibody for the detection of BCL-6 protein in paraffin sections. *J Histochem Cytochem* 54:31-8, 2006.
2. Montes-Moreno S, Roncador G, Maestre L, et al: Gcet1 (centerin), a highly restricted marker for a subset of germinal center-derived lymphomas. *Blood* 111:351-358, 2008.

Supplementary Table S1: Main clinical and biological characteristics

| All DLBCL (n=297)                  |                   |
|------------------------------------|-------------------|
| <b>Age, years</b>                  |                   |
| > 60                               | 166 of 278 (60)   |
| ≤ 60                               | 112 of 278 (40)   |
| <b>Ann Arbor stage</b>             |                   |
| I-II                               | 113 of 269 (42)   |
| III-IV                             | 156 of 269 (58)   |
| <b>LDH</b>                         |                   |
| Low                                | 101 of 243 (42)   |
| > upper limit of normal            | 142 of 243 (58)   |
| <b>Extranodal sites</b>            |                   |
| ≤ 1                                | 175 of 238 (74)   |
| ≥ 2                                | 63 of 238 (26)    |
| <b>ECOG †</b>                      |                   |
| PS ≤ 1                             | 166 of 239 (69)   |
| PS > 1                             | 73 of 239 (31)    |
| <b>IPI score ‡</b>                 |                   |
| Low (0-2)                          | 151 of 277 (54.5) |
| High (3-5)                         | 126 of 277 (45.5) |
| <b>Cell of origin subtype</b>      |                   |
| <b>Hans Classification</b>         |                   |
| Non-GCB                            | 157 of 272 (58)   |
| GCB                                | 115 of 272 (42)   |
| <b>Choi classification</b>         |                   |
| NON-GCB                            | 154 of 272 (57)   |
| GCB                                | 118 of 272 (43)   |
| <b>Visco-Young classification</b>  |                   |
| NON-GCB                            | 170 of 282 (60)   |
| GCB                                | 112 of 282 (40)   |
| <b>MYC</b>                         |                   |
| <i>MYC</i> translocation           | 15 of 206 (7)     |
| <i>MYC</i> gain                    | 37 of 191 (19)    |
| Positive MYC protein expression    | 62 of 140 (44)    |
| <b>BCL2</b>                        |                   |
| <i>BCL2</i> translocation          | 36 of 187 (19)    |
| <i>BCL2</i> gain                   | 25 of 181 (14)    |
| Positive BCL2 protein expression   | 83 of 138 (60)    |
| <b>BCL6</b>                        |                   |
| <i>BCL6</i> translocation          | 51 of 171 (30)    |
| <i>BCL6</i> gain                   | 30 of 180 (17)    |
| Positive BCL6 protein expression   | 200 of 281 (71)   |
| <b>pSTAT3 protein expression</b>   | 50 of 156 (32)    |
| <b>IRF4</b>                        |                   |
| <i>IRF4</i> translocation          | 3 of 76 (4)       |
| <i>IRF4</i> gain                   | 4 of 41 (10)      |
| <b>IHC MYC+/BCL2+</b>              | 42 of 126 (33)    |
| <b>FISH MYC+/BCL2 + MYC+/BCL6+</b> | 5 of 126 (4)      |

Abbreviations: DLBCL, diffuse large B-cell lymphoma; ECOG PS, Eastern Cooperative Oncology Group performance status; GCB, germinal center B-cell-like; IPI, International Prognostic Index; LDH, lactate dehydrogenase; †ECOG PS ranges from 0 to 4, where a higher score indicates greater impairment. ‡IPI score ranges from 0 to 5, with 0 indicating the absence of prognostic factors and 5 indicating the presence of all prognostic factors; IHC: Immunohistochemical.

**Supplementary Table S2: International prognostic index (IPI) and *MYC*, *BCL2*, *BCL6* and *IRF4* abnormalities according to the cell of origin classification (GCB vs. non-GCB)**

| Cohort                      | Choi classification (n=275) |    |                |    |              | Visco-Young classification (n=282) |            |            |                |              | Hans classification (n=281) |    |             |    |                  |   |
|-----------------------------|-----------------------------|----|----------------|----|--------------|------------------------------------|------------|------------|----------------|--------------|-----------------------------|----|-------------|----|------------------|---|
|                             | GCB(n=120)                  |    | Non GCB(n=155) |    |              | p                                  | GCB(n=112) |            | NON-GCB(n=170) |              |                             | p  | GCB (n=121) |    | Non GCB(n=160)   |   |
|                             | No                          | %  | No             | %  | No           |                                    | %          | No         | %              | No           | %                           |    | No          | %  | No               | % |
| Age, years                  |                             |    |                |    |              |                                    |            |            |                |              |                             |    |             |    |                  |   |
| > 60                        | 66 of 114                   | 58 | 92 of 146      | 63 | 0.402        | 62 of 106                          | 59         | 98 of 159  | 62             | 0.608        | 65 of 114                   | 57 | 95 of 150   | 63 | 0.298            |   |
| ≤ 60                        | 48 of 114                   | 42 | 54 of 146      | 37 |              | 44 of 106                          | 41         | 61 of 159  | 38             |              | 49 of 114                   | 43 | 55 of 150   | 37 |                  |   |
| Ann Arbor stage III-IV      | 52 of 110                   | 47 | 97 of 144      | 67 | <b>0.001</b> | 47 of 102                          | 46         | 104 of 156 | 67             | <b>0.001</b> | 50 of 108                   | 46 | 102 of 147  | 69 | <b>&lt;0.001</b> |   |
| LDH > upper limit of normal | 53 of 99                    | 53 | 80 of 128      | 63 | 0.174        | 45 of 91                           | 50         | 90 of 141  | 64             | <b>0.030</b> | 49 of 98                    | 50 | 86 of 132   | 65 | <b>0.021</b>     |   |
| Extranodal sites ≤ 2        | 25 of 98                    | 25 | 33 of 125      | 26 | 0.881        | 24 of 91                           | 26         | 35 of 137  | 26             | .0889        | 21 of 97                    | 22 | 38 of 128   | 30 | 0.175            |   |
| ECOG PS > 1†                | 23 of 97                    | 24 | 43 of 126      | 34 | 0.091        | 17 of 90                           | 19         | 50 of 138  | 36             | <b>0.005</b> | 20 of 97                    | 21 | 48 of 129   | 37 | <b>0.007</b>     |   |
| IPI score ‡ High (3-5)      | 43 of 116                   | 37 | 77 of 146      | 53 | <b>0.011</b> | 39 of 107                          | 36         | 83 of 159  | 52             | <b>0.011</b> | 38 of 112                   | 34 | 84 of 151   | 56 | <b>&lt;0.001</b> |   |

Abbreviations: GCB: germinal center B-cell-like; DLBCL, diffuse large B-cell lymphoma; ECOG PS, Eastern Cooperative Oncology Group performance status; IPI, International Prognostic Index; LDH: lactate dehydrogenase; DHL double-hit lymphoma; †ECOG PS ranges from 0 to 4, where a higher score indicates greater impairment. ‡IPI score ranges from 0 to 5, with 0 indicating the absence of prognostic factors and 5 indicating the presence of all prognostic factors.

Supplementary Table S3: Clinical features according to the presence of MYC and BCL6 protein expression

| Patients, No.<br>(%)                     | MYC protein expression<br>(n=62/140) |                    |              | BCL6 protein expression<br>(n=200/281) |                     |              |
|------------------------------------------|--------------------------------------|--------------------|--------------|----------------------------------------|---------------------|--------------|
|                                          | Negative<br>(n=78)                   | Positive<br>(n=62) | P            | Negative<br>(n=81)                     | Positive<br>(n=200) | P            |
| <b>Age, years</b>                        |                                      |                    |              |                                        |                     |              |
| > 60                                     | 40 (58)                              | 38 (72)            | 0.118        | 42 (57)                                | 119 (63)            | 0.379        |
| ≤ 60                                     | 29 (42)                              | 15 (28)            |              | 32 (43)                                | 71 (37)             |              |
| <b>Ann Arbor stage</b>                   |                                      |                    |              |                                        |                     |              |
| I-II                                     | 27 (40)                              | 15 (29)            | 0.245        | 23 (31)                                | 80 (44)             | <b>0.053</b> |
| III-IV                                   | 41 (60)                              | 36 (71)            |              | 51 (69)                                | 101 (56)            |              |
| <b>LDH</b>                               |                                      |                    |              |                                        |                     |              |
| Low                                      | 34 (51)                              | 14 (27)            | <b>0.011</b> | 21 (32)                                | 73 (44)             | 0.076        |
| > upper limit<br>of normal               | 33 (49)                              | 37 (72)            |              | 45 (68)                                | 91 (56)             |              |
| <b>Extranodal sites</b>                  |                                      |                    |              |                                        |                     |              |
| ≤ 1                                      | 45 (67)                              | 36 (69)            | 0.810        | 45 (69)                                | 121 (76)            | 0.323        |
| ≥ 2                                      | 21 (33)                              | 16 (31)            |              | 20 (31)                                | 39 (24)             |              |
| <b>ECOG †</b>                            |                                      |                    |              |                                        |                     |              |
| PS ≤ 1                                   | 43 (63)                              | 29 (56)            | 0.408        | 36 (54)                                | 120 (75)            | <b>0.002</b> |
| PS > 1                                   | 25 (37)                              | 23 (43)            |              | 30 (46)                                | 40 (25)             |              |
| <b>IPI score ‡</b>                       |                                      |                    |              |                                        |                     |              |
| Low (0-2)                                | 38 (56)                              | 19 (36)            | <b>0.029</b> | 35 (48)                                | 105 (55)            | 0.287        |
| High (3-5)                               | 30 (44)                              | 34 (64)            |              | 38 (52)                                | 85 (45)             |              |
| <b>MYC</b>                               |                                      |                    |              |                                        |                     |              |
| rMYC                                     | 3 (5)                                | 5 (10)             | 0.334        | 4 (7)                                  | 10 (7)              | 0.926        |
| gMYC                                     | 11 (20)                              | 5 (11)             | 0.196        | 6 (12)                                 | 31 (23)             | 0.092        |
| <b>BCL2</b>                              |                                      |                    |              |                                        |                     |              |
| rBCL2                                    | 13 (30)                              | 8 (18)             | 0.211        | 1 (2)                                  | 34 (24)             | <b>0.001</b> |
| gBCL2                                    | 7 (16)                               | 4 (9)              | 0.375        | 9 (21)                                 | 16 (12)             | 0.115        |
| <b>BCL6</b>                              |                                      |                    |              |                                        |                     |              |
| rBCL6                                    | 15(32)                               | 15 (31)            | 0.891        | 12 (28)                                | 39 (31.5)           | 0.664        |
| gBCL6                                    | 5(12)                                | 4(8)               | 0.596        | 2 (5)                                  | 28 (21)             | <b>0.018</b> |
| <b>pSTAT3<br/>protein<br/>expression</b> | 15(21)                               | 26 (44)            | <b>0.006</b> | 15 (30)                                | 34 (35)             | 0.566        |
| <b>IRF4</b>                              |                                      |                    |              |                                        |                     |              |
| rIRF4                                    | 2 (5)                                | 0                  | 0.247        | 0                                      | 3 (6)               | 0.198        |
| gIRF4                                    | 4 (19)                               | 0                  | 0.122        | 3 (18)                                 | 1 (4)               | 0.152        |

Abbreviations: IPI, International Prognostic Index; LDH, lactate dehydrogenase; rMYC: rearrangement of MYC; gMYC: gain of MYC locus; rBCL2: rearrangement of BCL2; gBCL2: gain of BCL2 locus; rBCL6 rearrangement of BCL6; gBCL6: gain of BCL6 locus †ECOG PS ranges from 0 to 4, where a higher score indicates greater impairment. ‡ IPI score ranges from 0 to 5, with 0 indicating the absence of prognostic factors and 5 indicating the presence of all prognostic factors.

Supplementary Table S4: MYC, BCL2, BCL6, pSTAT3 pattern expression according to the cell of origin classification

| Cohort                          | Choi classification (n=275) |    |                    |    |                  | Visco-Young classification (n=282) |    |                    |    |              | Hans classification (n=281) |    |                    |    |                  |
|---------------------------------|-----------------------------|----|--------------------|----|------------------|------------------------------------|----|--------------------|----|--------------|-----------------------------|----|--------------------|----|------------------|
|                                 | GBC<br>(n=120)              |    | Non-GCB<br>(n=155) |    | p                | GCB<br>(n=112)                     |    | Non-GCB<br>(n=170) |    | p            | GBC<br>(n=121)              |    | Non-GCB<br>(n=160) |    | p                |
| No                              | %                           | No | %                  | No |                  | %                                  | No | %                  | No |              | %                           | No | %                  | No |                  |
| MYC protein expression          | 18 of 51                    | 35 | 39 of 77           | 51 | 0.087            | 20 of 52                           | 39 | 41 of 82           | 50 | 0.191        | 16 of 44                    | 36 | 43 of 89           | 48 | 0.192            |
| BCL2 protein expression         | 27 of 52                    | 52 | 53 of 76           | 70 | <b>0.041</b>     | 30 of 52                           | 58 | 51 of 81           | 63 | 0.543        | 23 of 45                    | 51 | 57 of 86           | 66 | 0.091            |
| BCL6 protein expression         | 104 of 116                  | 90 | 88 of 154          | 57 | <b>&lt;0.001</b> | 109 of 119                         | 92 | 90 of 159          | 57 | <b>0.000</b> | 100 of 110                  | 91 | 97 of 166          | 58 | <b>&lt;0.001</b> |
| pSTAT3 protein expression       | 14 of 54                    | 26 | 32 of 90           | 35 | 0.230            | 11 of 53                           | 21 | 39 of 95           | 41 | <b>0.012</b> | 11 of 45                    | 24 | 37 of 103          | 36 | 0.170            |
| MYC and BCL2 protein expression | 8 of 46                     | 17 | 33 of 72           | 46 | <b>0.002</b>     | 7 of 40                            | 17 | 34 of 81           | 42 | <b>0.007</b> | 10 of 47                    | 21 | 32 of 76           | 42 | <b>0.018</b>     |

Abbreviations: DLBCL, diffuse large B-cell lymphoma; ECOG PS, Eastern Cooperative Oncology Group performance status; GCB, germinal center B-cell-like.

**Supplementary Table S5: Clinical characteristics of immunohistochemical double-positive cases and pSTAT3 protein expression**

| Patients, No. (%)       | IHC             |                  | pSTAT3  |              |
|-------------------------|-----------------|------------------|---------|--------------|
|                         | Double-positive | P                |         | P            |
| <b>Age, years</b>       |                 |                  |         |              |
| > 60                    | 29 (74)         | 0.088            | 28 (60) | 0.690        |
| ≤ 60                    | 10 (26)         |                  | 19 (40) |              |
| <b>Ann Arbor stage</b>  |                 |                  |         |              |
| I-II                    | 10 (26)         | 0.111            | 9 (20)  | <b>0.002</b> |
| III-IV                  | 29 (74)         |                  | 37 (80) |              |
| <b>LDH</b>              |                 |                  |         |              |
| Low                     | 7 (18)          | <b>&lt;0.001</b> | 17 (38) | 0.709        |
| > upper limit of normal | 32 (82)         |                  | 28 (62) |              |
| <b>Extranodal sites</b> |                 |                  |         |              |
| ≤ 1                     | 25 (64)         | 0.599            | 34 (74) | 0.633        |
| ≥ 2                     | 14 (36)         |                  | 12 (26) |              |
| <b>ECOG</b>             |                 |                  |         |              |
| PS ≤ 1                  | 22 (56)         | 0.531            | 26 (56) | 0.108        |
| PS > 1                  | 17 (44)         |                  | 20 (44) |              |
| <b>IPI score</b>        |                 |                  |         |              |
| Low (0-2)               | 13 (32)         | <b>0.005</b>     | 19 (40) | <b>0.041</b> |
| High (3-5)              | 28 (68)         |                  | 28 (60) |              |

Abbreviations: ECOG PS, Eastern Cooperative Oncology Group performance status; GCB, germinal center B-cell-like; GEP, gene expression profiling; IPI, International Prognostic Index; LDH, lactate dehydrogenase; †ECOG PS ranges from 0 to 4, where a higher score indicates greater impairment. ‡IPI score ranges from 0 to 5, with 0 indicating the absence of prognostic factors and 5 indicating the presence of all prognostic factors.

Supplementary Table S6: Gene abnormalities of immunohistochemical double-positive cases

| Patients, No. (%)                       | IHC             |              |
|-----------------------------------------|-----------------|--------------|
|                                         | Double-positive | P            |
| <b>Cell of origin subtype</b>           |                 |              |
| Hans classification                     |                 |              |
| Non-GCB                                 | 33 (76)         | <b>0.018</b> |
| GCB                                     | 10 (24)         |              |
| Choi classification                     |                 |              |
| Non-GCB                                 | 33 (81)         | <b>0.002</b> |
| GCB                                     | 8 (19)          |              |
| Visco-Young classification              |                 |              |
| Non-GCB                                 | 34 (83)         | <b>0.007</b> |
| GCB                                     | 7 (17)          |              |
| <b>MYC</b>                              |                 |              |
| <i>MYC</i> translocation                | 5 (15)          | <b>0.030</b> |
| <i>MYC</i> gains                        | 3 (10)          | 0.232        |
| Positive <i>MYC</i> protein expression  | -               | -            |
| <b>BCL2</b>                             |                 |              |
| <i>BCL2</i> translocation               | 8 (24)          | 0.938        |
| <i>BCL2</i> gains                       | 3 (10)          |              |
| Positive <i>BCL2</i> protein expression | -               | 0.522        |
| <b>BCL6</b>                             |                 |              |
| <i>BCL6</i> translocation               | 11 (32)         | 0.745        |
| <i>BCL6</i> gains                       | 4 (12)          | 0.724        |
| Positive <i>BCL6</i> protein expression | 29 (69)         | 0.647        |
| <b>pSTAT3</b> protein expression        | 16 (39)         | 0.114        |
| <b>IRF4</b>                             |                 |              |
| <i>IRF4</i> translocation               | 0               | 0.439        |
| <i>IRF4</i> gains                       | 0               | 0.139        |

Abbreviations: DLBCL, diffuse large B-cell lymphoma; GCB, germinal center B-cell-like.

Supplementary Table S7: Clinical features with respect to the presence of *MYC*, *BCL2* and *BCL6* gains

| Patients, No. (%)       | <i>MYC</i> (n=37/191) |              | <i>BCL2</i> (n=25/181) |       | <i>BCL6</i> (n=30/180) |       |
|-------------------------|-----------------------|--------------|------------------------|-------|------------------------|-------|
|                         | Gained                | P            | Gained                 | P     | Gained                 | P     |
| <b>Age, years</b>       |                       |              |                        |       |                        |       |
| > 60                    | 26 (74)               | 0.167        | 3 (59)                 | 0.672 | 18 (60)                | 0.862 |
| ≤ 60                    | 9 (26)                |              | 9 (41)                 |       | 12 (40)                |       |
| <b>Ann Arbor stage</b>  |                       |              |                        |       |                        |       |
| I-II                    | 16 (47)               | 0.254        | 9 (43)                 | 0.546 | 12 (44)                | 0.740 |
| III-IV                  | 18 (53)               |              | 12 (57)                |       | 15 (56)                |       |
| <b>LDH</b>              |                       |              |                        |       |                        |       |
| Low                     | 18 (60)               | <b>0.032</b> | 9 (50)                 | 0.501 | 8 (40)                 | 0.576 |
| > upper limit of normal | 12 (40)               |              | 9 (59)                 |       | 12 (60)                |       |
| <b>Extranodal sites</b> |                       |              |                        |       |                        |       |
| ≤ 1                     | 22 (73)               | 0.484        | 13 (72)                | 0.890 | 11 (61)                | 0.343 |
| ≥ 2                     | 8 (27)                |              | 5 (28)                 |       | 7 (39)                 |       |
| <b>ECOG †</b>           |                       |              |                        |       |                        |       |
| PS ≤ 1                  | 23 (77)               | 0.330        | 13 (72)                | 0.578 | 1 (61)                 | 0.482 |
| PS > 1                  | 7 (23)                |              | 5 (28)                 |       | 7 (39)                 |       |
| <b>IPI score ‡</b>      |                       |              |                        |       |                        |       |
| Low (0-2)               | 19 (54)               | 0.650        | 13 (59)                | 0.303 | 17 (57)                | 0.812 |
| High (3-5)              | 16 (46)               |              | 9 (41)                 |       | 13 (43)                |       |

Abbreviations: DLBCL, diffuse large B-cell lymphoma; ECOG PS, Eastern Cooperative Oncology Group performance status; GCB, germinal center B-cell-like; IPI, International Prognostic Index; LDH, lactate dehydrogenase; †ECOG PS ranges from 0 to 4, where higher score indicates greater degree of impairment. ‡IPI score ranges from 0 to 5, with 0 indicating absence of prognostic factors and 5 indicating presence of all prognostic factors.



Supplementary Table S8: Clinical and biological characteristics of double-hit cases

| FISH double-hit <i>BCL2</i> +/ <i>MYC</i> + (n=5/126)  |         |
|--------------------------------------------------------|---------|
| <b>Age, years</b>                                      |         |
| > 60                                                   | 4 (80)  |
| ≤ 60                                                   | 1 (20)  |
| <b>Ann Arbor stage</b>                                 |         |
| I-II                                                   | 2 (40)  |
| III-IV                                                 | 3 (60)  |
| <b>LDH</b>                                             |         |
| Low                                                    | 1 (20)  |
| > upper limit of normal                                | 4 (80)  |
| <b>Extranodal sites</b>                                |         |
| ≤ 1                                                    | 3 (60)  |
| ≥ 2                                                    | 2 (40)  |
| <b>ECOG †</b>                                          |         |
| PS ≤ 1                                                 | 3 (60)  |
| PS > 1                                                 | 2 (40)  |
| <b>IPI score ‡I</b>                                    |         |
| Low (0,1,2)                                            | 3 (60)  |
| High (3, 4 or 5)                                       | 2 (40)  |
| <b>Cell of origin subtype</b><br>(Hans classification) |         |
| Non-GCB                                                | 1 (20)  |
| GCB                                                    | 4 (80)  |
| (Choi classification)                                  |         |
| NON-GCB                                                | 1 (20)  |
| GCB                                                    | 4 (80)  |
| (Visco-Young classification)                           |         |
| NON-GCB                                                | 1 (20)  |
| GCB                                                    | 4 (80)  |
| <b>MYC</b>                                             |         |
| <i>MYC</i> translocation                               | 5 (100) |
| <i>MYC</i> gained                                      | 1 (20)  |
| Positive MYC protein expression                        | 4 (100) |
| <b>BCL2</b>                                            |         |
| <i>BCL2</i> translocation                              | 4 (100) |
| <i>BCL2</i> gains                                      | 0       |
| Positive BCL2 protein expression                       | 4 (100) |
| <b>BCL6</b>                                            |         |
| <i>BCL6</i> translocation                              | 1 (20)  |
| <i>BCL6</i> gains                                      | 0       |
| Positive BCL6 protein expression                       | 4 (80)  |
| <b>pSTAT3 protein expression</b>                       | 0       |
| <b>IRF4</b>                                            |         |
| <i>IRF4</i> translocation                              | 0       |
| <i>IRF4</i> gained                                     | 0       |

Abbreviations: DLBCL, diffuse large B-cell lymphoma; ECOG PS, Eastern Cooperative Oncology Group performance status; GCB, germinal center B-cell-like; IPI, International Prognostic Index; LDH, lactate dehydrogenase; †ECOG PS ranges from 0 to 4, where higher score indicates greater degree of impairment. ‡IPI score ranges from 0 to 5, with 0 indicating absence of prognostic factors and 5 indicating presence of all prognostic factors; IHC: Immunohistochemical.

Supplementary Table S9: Progression free survival in the GCB group, with respect to immunohistochemical double-positive cases and abnormalities of *MYC*, *BCL2* and *BCL6*

|                                        | GCB-Hans         |              | GCB-Choi          |              | GCB-Visco           |              |
|----------------------------------------|------------------|--------------|-------------------|--------------|---------------------|--------------|
|                                        | PFS              |              | PFS               |              | PFS                 |              |
|                                        | RR 95%CI         | p            | RR 95%CI          | p            | RR 95%CI            | p            |
| <b>MYC</b>                             |                  |              |                   |              |                     |              |
| <i>rMYC</i>                            | 3.5 (1.09-11.25) | <b>0.035</b> | 3.2 (1.03-10.28)  | <b>0.044</b> | 4.2 (1.2-14.5)      | <b>0.021</b> |
| <i>gMYC</i>                            | 0.5 (0.15-1.9)   | 0.346        | 0.5 (0.158-1.94)  | 0.355        | 0.89 (0.237-3.372)  | 0.869        |
| MYC protein expression                 | 1.5 (0.59-4)     | 0.376        | 1.1 (0.4-2.867)   | 0.811        | 0.765 (0.230-2.548) | 0.662        |
| <b>BCL2</b>                            |                  |              |                   |              |                     |              |
| <i>rBCL2</i>                           | 1.9 (0.75-4.8)   | 0.172        | 1.7 (0.69-4.2)    | 0.246        | 2.01 (0.728-5.55)   | 0.178        |
| <i>gBCL2</i>                           | 0.8 (0.1-6.27)   | 0.852        | 0.7 (0.098-5.5)   | 0.770        | 0.9 (0.1-6.9)       | 0.922        |
| BCL2 protein expression                | 1.4 (0.47-4.1)   | 0.544        | 1.5 (0.5-4.3)     | 0.422        | 2.0 (0.5-7.8)       | 0.309        |
| <b>BCL6</b>                            |                  |              |                   |              |                     |              |
| <i>rBCL6</i>                           | 1.2 (0.3-4.4)    | 0.752        | .3 (0.370-4.761)  | 0.664        | 0.5 (0.06-3.9)      | 0.512        |
| <i>gBCL6</i>                           | 0.03 (0.0-4.3)   | 0.168        | 0.031 (0.0-3.761) | 0.156        | 0.036 (0-23)        | 0.315        |
| BCL6 protein expression                | 1.6 (0.3-6.9)    | 0.522        | 1.3 (0.38-4.47)   | 0.673        | 1.175 (0.269-5.137) | 0.830        |
| <b>MYC and BCL2 protein expression</b> | 2.5 (0.8-7.8)    | 0.100        | 2.3 (0.7-7.8)     | 0.153        | 4 (1-15)            | <b>0.041</b> |

Abbreviations: GCB: germinal center B-cell-like; DLBCL, diffuse large B-cell lymphoma; *rMYC*: translocation of *MYC*; *gMYC*: gain of *MYC* locus; *rBCL2*: translocation of *BCL2*; *gBCL2*: gain of *BCL2* locus; *rBCL6* translocation of *BCL6*; *gBCL6*: gain of *BCL6* locus.

Supplementary Table S10: Overall survival in the GCB group, with respect to immunohistochemical double-positive cases and abnormalities of *MYC*, *BCL2* and *BCL6*

|                                 | GCB-Hans          |       | GCB-Choi         |       | GCB-Visco          |       |
|---------------------------------|-------------------|-------|------------------|-------|--------------------|-------|
|                                 | OS                |       | OS               |       | OS                 |       |
|                                 | RR 95%CI          | p     | RR 95%CI         | p     | RR 95%CI           | p     |
| MYC                             |                   |       |                  |       |                    |       |
| <i>rMYC</i>                     | 2.5 (0.709-8.9)   | 0.153 | 2.2 (0.65-7.9)   | 0.198 | 2.9 (0.8-10.8)     | 0.098 |
| <i>gMYC</i>                     | 0.6 (0.178-2.2)   | 0.479 | 0.59 (0.17-2.05) | 0.410 | 0.8 (0.2-3.1)      | 0.793 |
| MYC protein expression          | 2.2 (0.69-7.4)    | 0.177 | 1.06 (0.3-3.5)   | 0.924 | 0.76 (0.1-4.19)    | 0.754 |
| BCL2                            |                   |       |                  |       |                    |       |
| <i>rBCL2</i>                    | 0.629 (0.2-1.98)  | 0.429 | 0.5 (0.167-1.5)  | 0.233 | 0.469 (0.13-1.68)  | 0.246 |
| <i>gBCL2</i>                    | 1.03 (0.133-8.0)  | 0.974 | 0.829 (0.1-6.3)  | 0.856 | 1.0 (0.132-7.9)    | 0.984 |
| BCL2 protein expression         | 0.7 (0.2-2.7)     | 0.686 | 0.7 (0.19-2.5)   | 0.586 | 0.578 (0.096-3.46) | 0.549 |
| BCL6                            |                   |       |                  |       |                    |       |
| <i>rBCL6</i>                    | 1.6 (0.5-5.28)    | 0.376 | 1.79 (0.57-5.6)  | 0.317 | 1.05 (0.2-4.8)     | 0.947 |
| <i>gBCL6</i>                    | 0.48 (0.109-2.1)  | 0.337 | 0.428 (0.09-1.8) | 0.257 | 0.79 (0.175-3.56)  | 0.760 |
| BCL6 protein expression         | 1.03 (0.236-4.57) | 0.960 | 0.657 (0.08-5.3) | 0.695 | 0.57 (0.154-2.1)   | 0.401 |
| MYC and BCL2 protein expression | 1.8 (0.46-7.5)    | 0.378 | 0.6 (0.08-5.3)   | 0.695 | 1.45 (0.150-14.1)  | 0.745 |

Abbreviations: GCB: germinal center B-cell-like; DLBCL, diffuse large B-cell lymphoma; *rMYC*: translocation of *MYC*; *gMYC*: gain of *MYC* locus; *rBCL2*: translocation of *BCL2*; *gBCL2*: gain of *BCL2* locus; *rBCL6* translocation of *BCL6*; *gBCL6*: gain of *BCL6* locus.
